# Supplementary material
Source: PubMed Central journal article supplement (PMC4168399)
Supplement: gf498sup_10-1055-s-0032-1315089.pdf [file gf498sup_10-1055-s-0032-1315089.pdf]

# Der prädiktive Wert der Gruppe III D und eines zusätzlichen HPV-Tests

## Predictive Value of Class III D Cytological Diagnosis (Munich II, Low and Moderate Dysplasia) and Additional High-risk HPV Testing

**Autor**

P. Ziemke

**Institut**

Gemeinschaftspraxis für Pathologie Dr. Wolf, A. Amirmaki, Dr. Ziemke, Potsdam

### Schlüsselwörter

- Zervixkarzinom
- Zervixzytologie
- Gruppe III D
- Dysplasie
- CIN

### Key words

- cervical carcinoma
- cervical cytology
- class III D
- dysplasia
- CIN

### Zusammenfassung

Die Aussagekraft zytologischer Diagnosen im Rahmen der Erkennung von Vor- und Frühstufen des Zervixkarzinoms ist durch biologische Gegebenheiten, Unsicherheiten in der Materialerfassung und den subjektiven Charakter der mikroskopischen Beurteilung eingeschränkt. Besonders bei der Gruppe III D der Münchner Nomenklatur II führt dies zur Stigmatisierung von Patientinnen und Unsicherheiten hinsichtlich weiterer Kontroll- und Therapiemaßnahmen. Vor einem sinnvollen Einsatz von Zusatzuntersuchungen (z.B. High-Risk-HPV-Testung, Biomarker) erscheint es nötig, den positiven prädiktiven Wert der Gruppe III D im Routinematerial zu ermitteln. Dazu wurden in der Zeit von 2002 bis 2008 alle Patientinnen unserer Praxis mit der Erstdiagnose III D im Abstrichpräparat und aktuell bekanntem HPV-Status mit allen relevanten Daten (n = 1190, 38,2% histologisch geklärt anlässlich der Therapie mittels Konisation bzw. Biopsie vor Laservaporisation) erfasst und der weitere zytologische bzw. histologische Verlauf auswertbar dokumentiert. Es werden vergleichende Auswertungen unter Einbeziehung von Alter, Verlaufsdauer und Persistenz von III D pro Patientin vorgestellt. Insgesamt errechnet sich für die konventionelle Zytologie ein positiver Prädiktionswert für CIN 2+ von 32,3% bei einer durchschnittlichen Verlaufsdauer von 39,7 Monaten. Für die High-Risk-HPV-Testung finden sich folgende Werte (%): Sensitivität 94,8, Spezifität 39, positiver prädiktiver Wert 42,8 und negativer prädiktiver Wert 94. Die zusätzliche Information aus dem High-Risk-HPV-Test führt bei Patientinnen der Altersgruppen ab 40 Jahre zu statistisch signifikant besserer positiver Prädiktion. Eine individuelle Risikostratifizierung ist für die III D-Patientinnen insgesamt nicht ableitbar.

### Abstract

The validity of cytological diagnostic procedures for the detection of pre- and early cervical cancer stages is limited due to biological conditions, the uncertainty of cell sampling, and the subjective nature of microscopic assessment. Particularly in class III D cases (Munich II) this can lead to a stigmatization of patients and uncertainty with regard to further clinical follow-up and therapy. Prior to carrying out additional investigations such as high-risk HPV testing or the examination of biomarkers, the positive predictive values of patients with a class III D cytological diagnosis need to be assessed in routine practice. To this end, all relevant data from patients from our practice classed as class III D (pap smears) between 2002 and 2008 (n = 1190; 38.2% histological diagnosis = therapeutic endpoint) and their current HPV status were recorded. Cytology, histology, persistence, age and follow-up were recorded. The database was used for comparative statistical analysis. Overall, the positive predictive value of conventional pap smear for CIN 2+ was calculated to be 32.3% (mean follow-up: 39.7 months). The following values were calculated for high-risk HPV testing: sensitivity 94.8%, specificity 39%, positive predictive value 42.8%, negative predictive value 94%. The additional information obtained from high-risk HPV testing resulted in a significantly better positive predictive value only in patients older than 40 years. However, there was no evidence for an individual risk stratification approach which would reduce uncertainty in the management of III D patients.

**eingereicht** 21. 12. 2011  
**revidiert** 7. 5. 2012  
**akzeptiert** 18. 5. 2012

### Bibliografie

**DOI** <http://dx.doi.org/10.1055/s-0032-1315089>  
 Geburtsh Frauenheilk 2012; 72: 1–8 © Georg Thieme Verlag KG Stuttgart · New York · ISSN 0016-5751

### Korrespondenzadresse

**Dr. med. Peter Ziemke**  
 Gemeinschaftspraxis für Pathologie Dr. Wolf, A. Amirmaki, Dr. Ziemke  
 Amtsstraße 5 a  
 14469 Potsdam  
 gppathopotsdam@t-online.de;  
 peter.ziemke@t-online.de

## Einleitung

Vorstadien des Zervixkarzinoms sind die Zielläsionen der Zytologie im Rahmen der gynäkologischen Krebsfrüherkennungsuntersuchung. Ihre Auffindung ermöglicht eine Unterbrechung der Karzinogenese und verhindert so sekundär-präventiv die Entstehung von Karzinomen.

Für die im Interesse der Patientinnen unabdingbare Kommunikation zwischen den beteiligten Fachdisziplinen (Zytologie, Gynäkologie, Histologie) war es nötig, die Erkenntnisse zur Pathogenese in einheitliche diagnostische Begriffe zu fassen. Der amerikanische Pathologe Reagan griff 1953 den Begriff der Dysplasie auf und beschrieb 3 Schweregrade fakultativer Krebsvorstufen, die nicht die Kriterien des Carcinoma in situ als obligate Präkanzerose erfüllten [1]. Dieses Konzept wurde 1973 in die Terminologie der WHO übernommen. Der 1968 von Richart geprägte Begriff der zervikalen intraepithelialen Neoplasie (CIN) brachte zum Ausdruck, dass sämtliche Vorstufen des Zervixkarzinoms Formen einer stufenweisen biologischen Entwicklung sind [2]. Dabei wurden aus praktischen Überlegungen der morphologischen Diagnostik und der Therapie die hochgradige Dysplasie und das Carcinoma in situ terminologisch als CIN 3 zusammengefasst. Die in Deutschland 1976 eingeführte und 1990 modifizierte Münchner Nomenklatur schuf auf der Basis von Papanicolaou eine Zuordnung der zytologischen Befundgruppen zu den histologischen Diagnosen [3]. Zellen einer geringgradigen und/oder mäßigen Dysplasie wurden der Gruppe III D zugeordnet und mit Empfehlungen für zytologische und kolposkopische Kontrollmaßnahmen verbunden. Therapeutische operative Maßnahmen waren und sind erst bei Nachweis von Zellen einer hochgradigen Dysplasie und/oder eines Carcinoma in situ (Gruppe IVa) vorgesehen. Das in den USA 1988 publizierte und 1992 sowie 2001 modifizierte Bethesda-System unterteilt in geringgradige (Zeichen der HPV-Infektion, CIN 1, leichte Dysplasie) und hochgradige (CIN 2 und 3, mäßige und schwere Dysplasie, Carcinoma in situ) intraepitheliale Läsionen, wobei klinischer Handlungsbedarf schon bei mäßiggradigen zytomorphologischen Veränderungen entsteht.

Gering- und mäßiggradige Dysplasien (Gruppe III D) sind aus der Erfahrung der gynäkologischen Vorsorgeuntersuchung auf Vor- und Frühstadien des Zervixkarzinoms mit etwa 60% die häufigsten positiven zytologischen Ergebnisse. Die Zytomorphologie der Gruppe III D lässt eine individuelle prognostische Aussage hinsichtlich der Möglichkeit einer spontanen Regression bzw. der Entwicklung einer CIN 3 oder eines Zervixkarzinoms nicht zu. Zudem findet sich in nachfolgenden histologischen Untersuchungen bei bekannter methodisch eingeschränkter Zellerfassung relativ häufig eine schon höhergradige Läsion [4]. Bei längerer Persistenz sind daher trotz diagnostischer Unsicherheiten therapeutische Maßnahmen indiziert, um eine Gefährdung der Patientin zu vermeiden [5,6].

Die zytologische Diagnose Gruppe III D ist häufig mit Differenzen zwischen allen aktiv und passiv Beteiligten verbunden:

In der *Zytologie* besteht Klarheit über die Subjektivität der Beurteilung von Zellatypien und deren Abgrenzung von Varianten physiologischer Zellveränderungen. Ebenso ist bekannt, dass die Möglichkeit des gleichzeitigen Vorliegens von im aktuellen Untersuchungsmaterial nicht erfassten höhergradigen plattenepithelialen Läsionen die Sicherheit der zytologischen Diagnose einer leichten bzw. mäßigen Dysplasie einschränkt.

Die die Patientin betreuende *Gynäkologie* hat mit der Mitteilung des zytologischen Befundes einer Gruppe III D eine Handlungs-

pflicht, sieht aber vor dem Hintergrund der o.g. Unsicherheiten keinen kurativen Handlungsbedarf. Die Mitteilung des pathologischen Befundes an die Patientin wird häufig mit der Einschränkung verbunden, dass es sich vermutlich um einen eher harmlosen Befund handelt. Abhängig von kolposkopischen und anderen Untersuchungsergebnissen werden länger- oder kurzfristige Kontrolluntersuchungen, u.U. auch therapeutische Maßnahmen angeschlossen.

Die *Patientin* wird von der Mitteilung eines für sie mehr oder weniger gut verständlichen zytologischen Befundes Gruppe III D meist überrascht. Sie hat u.U. schon jahrelang an einer Vorsorgeuntersuchung teilgenommen und ist unerwartet „krank“ bzw. wird sich des Risikos einer Krebserkrankung bewusst. In dieser Situation kommt neben der Psyche und Bildung der Patientin dem Verständnis des betreuenden Arztes für die Pathogenese und die Fähigkeit, dies zu kommunizieren, eine entscheidende Rolle zu.

Zusammenfassend muss man feststellen, dass die zytologische Diagnose Gruppe III D auf allen 3 Beteiligungsebenen einen ausgeprägt subjektiven Charakter hat und die Gefahr von Unter- oder Überreaktion bzw. Unter- oder Übertherapie mit deren negativen Folgen für die Patientinnen Realität ist [7].

Die wissenschaftlichen Erkenntnisse zu Ätiologie und Pathogenese des Zervixkarzinoms und seiner Vorstufen machen es heute möglich, mit dem Einsatz von Zusatzmethoden bzw. Biomarkern die Aussage zur individuellen Prognose bei einer zytologischen Diagnose Gruppe III D zu verbessern [8]. Die realistische Einschätzung des Effekts dieser materiell und finanziell aufwendigen Methoden bedarf einer Basis, die statistische Aussagen zum diagnostischen Wert der Gruppe III D in der konventionellen Zytologie enthält. Es existieren dazu nur sehr wenige Publikationen, häufiger werden empirische Mitteilungen kritisch kolportiert [9]. Randomisierte Studien gibt es bislang nicht, jedoch liegt nach jahrzehntelanger Verwendung der Gruppe III D in Deutschland natürlich ein riesiges Datenmaterial vor, dessen statistische Aufbereitung in Verlaufsstudien Ergebnisse zur diagnostischen Wertigkeit der Gruppe III D liefern kann [10–12]. Entscheidende Voraussetzungen für eine solche aussagekräftige Studie sind die exakte Definition von Einschlusskriterien und eine korrekte Erfassung der zytologischen und histologischen Folgeuntersuchungen bis zu einem durch histologische Klärung anlässlich der chirurgischen Therapie bzw. zeitlich vorgegebenen Follow-up-Ende.

## Fragestellung

Die vorliegende Untersuchung hat zum Ziel, statistisch relevante Aussagen hinsichtlich der individuellen Prognose eines ersten zytologischen Befundes der Gruppe III D unter den Routinebedingungen einer Praxis für Pathologie mit dem Schwerpunkt gynäkologische Zytologie zu machen. Gleichzeitig wird der Wert einer zusätzlichen HPV-Testung untersucht.

## Material und Methoden

Die hier vorgelegte Auswertung enthält ausschließlich Daten von anonymisierten Patientinnen unserer Praxis, die nach zytologisch unauffälliger Anamnese unterschiedlicher Dauer in der Früherkennungsuntersuchung erstmalig die zytologische Diagnose einer Gruppe III D bekommen hatten. Bei etwa 30 einseidenden Gynäkologen beträgt 1993–2010 die jährliche Anzahl

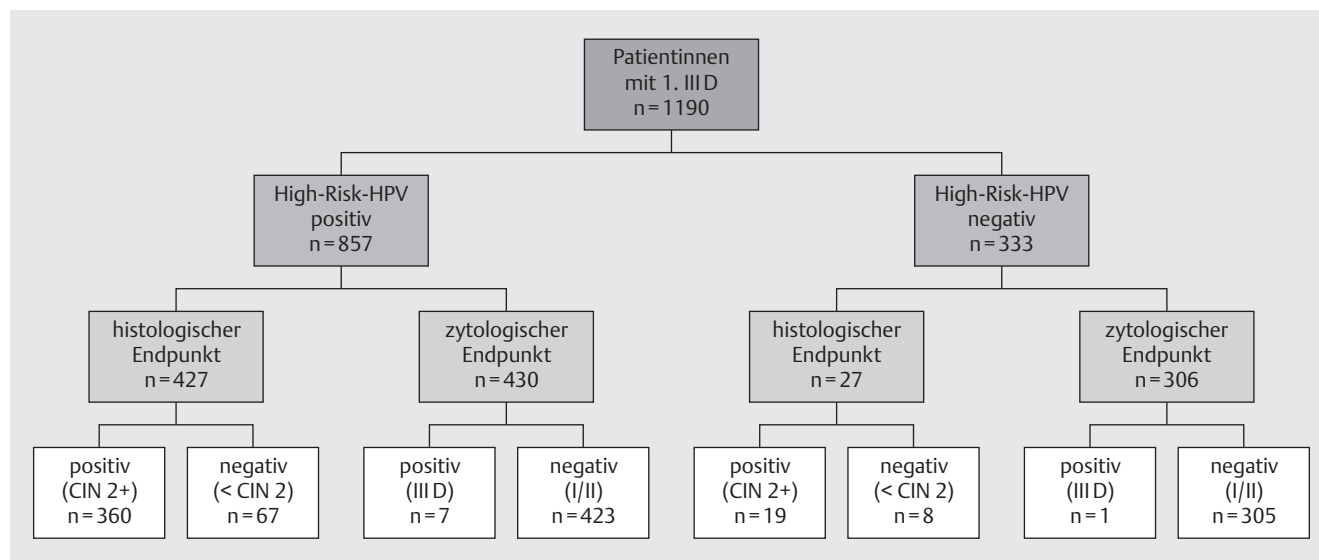

Abb. 1 Verlaufsdarstellung zum Auswertungszeitpunkt.

der zytologisch untersuchten Frauen im Mittel 56293 (min. 34722, max. 67523), im gesamten Zeitraum sind es 162090 Frauen. Die jährliche Häufigkeit (Prävalenzrate) von Patientinnen mit einer erstmaligen Diagnose Gruppe III D beträgt im Mittel 0,68% (min. 0,41, max. 1,23). Für die im genannten Zeitraum untersuchten 162090 Frauen beträgt der Anteil dieser 6944 Patientinnen 4,28%.

Die Diagnosen wurden im Screening konventioneller, nach Papanicolaou gefärbter Ausstrichpräparate nach den Kriterien der Münchner Nomenklatur II von einem seit 1985 schwerpunktmäßig zytologisch tätigen Facharzt für Pathologie erstellt. Eine zusätzliche Registrierung des aktuellen High-Risk-HPV-Infektionsstatus stellt eine sinnvolle Erweiterung der Auswertung dar. Da einerseits diese klinischen Angaben aber erst seit etwa 2001 in ausreichender Menge verfügbar waren und um andererseits eine ausreichend lange Auswertungszeit zu ermöglichen, wurde der Erfassungszeitraum vom 1.1.2002 bis 31.12.2008 gewählt. Die Ergebnisse der High-Risk-HPV-Untersuchungen stammen aus unterschiedlichen regionalen medizinischen Laboratorien und wurden nur in Ausnahmefällen nicht mittels HC II erstellt.

Es resultieren folgende Einschlusskriterien:

- ▶ Alle Patientinnen mit erstmalig Gruppe III D und
- ▶ bekanntem High-Risk-HPV-Status
- ▶ vom 1.1.2002 bis 31.12.2008.

Nach dieser Auswahl wurden konsekutiv 1190 Patientinnen mit einem Altersdurchschnitt von 31,25 Jahren aufgenommen. Bei einer Gesamtheit von 3090 Patientinnen mit einem ersten III D-Befund in diesem Zeitraum entspricht dies einer Stichprobengröße von 35,3%. High-Risk-HPV-positiv waren 857 und -negativ 333 Patientinnen. Alle bis zur Auswertung bekannt gewordenen zytologischen und histologischen Untersuchungsergebnisse wurden in einer in 3-Monats-Schritten strukturierten MS-Excel-Datei mit der Follow-up-Zeit erfasst. Das Beobachtungsende ist charakterisiert durch die histologische Klärung zum Zeitpunkt der Therapie (Portiokonisation, Portiobiopsien mit nachfolgender Laservaporisation) oder zytologische Kontrollergebnisse zu den Auswertungszeitpunkten (Abb. 1). Als positives Follow-up-Ergebnis wurden histologische Untersuchungsergebnisse CIN 2

und 3 sowie die Plattenepithelkarzinome und zytologische Befunde der Gruppen III D (aktuell 8 Fälle) gewertet. Zytologische Ergebnisse wurden nur einbezogen, wenn eine Beobachtungszeit von mindestens 12 Monaten mit mindestens 2 gleichlautenden, direkt aufeinanderfolgenden Befunden erreicht wurde. Diese Minimalforderung trifft aktuell noch auf 38 Patientinnen mit einem zytologischen Verlauf von weniger als 24 Monaten (12–18) zu. Insgesamt wurden 7758 zytologische Folgeuntersuchungen erfasst. Das jetzt gewählte Beobachtungsende basiert auf der Überlegung, dass 36 Monate nach Einschluss der letzten Patientin eine durchschnittliche Beobachtungszeit von 39,74 Monaten erreicht ist und weitere histologische Abklärungen in nennenswerter Zahl nicht mehr zu erwarten sind.

Definition der Zielkriterien:

Positiv:

- ▶ histologisch: CIN 2+
- ▶ zytologisch: mindestens 2 gleichlautende Befunde III D nach mindestens 12 Monaten

Negativ:

- ▶ histologisch: < CIN 2
- ▶ zytologisch: mindestens 2 gleichlautende negative Befunde (Gruppe I/II) nach mindestens 12 Monaten

Diese Vorgehensweise ermöglicht unter Angabe einer durchschnittlichen Follow-up-Dauer von 39,74 (min. 1, max. 117) Monaten eine statistische Gesamtauswertung aller Patientinnen mit der Gegenüberstellung der beiden eingangs erfassten Methoden Zytologie und High-Risk-HPV-Testung. Um validere prognostische Aussagen machen zu können, werden differenziertere Auswertungen mit dem Vergleich von Altersgruppen, der Anzahl des zytologischen Befundes III D pro Patientin und der Follow-up-Zeit durchgeführt. Dabei tritt allerdings das Problem auf, dass manche Patientinnen früher als andere aus der Beobachtung ausscheiden und damit die Datenstruktur verändert („zensiert“) wird. So werden z. B. histologische Klärungen anlässlich der Therapie im Mittel 17,05 Monate nach der erstmaligen Vergabe eines Befundes der Gruppe III D durchgeführt. Spätere Auswertungen erfassen nur die bis dahin in Kontrolle verbleibenden Patientinnen, der Anteil der zu diesen Auswertungszeitpunkten für die aktu-

**Tab. 1** Statistische Bewertung für Zytologie und High-Risk-HPV-Test.

| Test          | Art des Follow-ups | Sensitivität | Spezifität | positive Prädiktion | negative Prädiktion | Korrektheit | histologische Klärung (%) |
|---------------|--------------------|--------------|------------|---------------------|---------------------|-------------|---------------------------|
| Zytologie     | Histologie         | 98,94        |            | 83,33               |                     | 82,60       |                           |
|               | gesamt             | 98,97        |            | 32,29               |                     | 32,18       | 38,15                     |
| High-Risk-HPV | Histologie         | 94,99        | 10,67      | 84,31               | 29,63               | 81,06       |                           |
|               | gesamt             | 94,83        | 38,98      | 42,82               | 93,99               | 57,14       | 38,15                     |

**Tab. 2** Ergebnisse der histologisch geklärten Fälle.

| HPV-Status | Histologie               |                |                |                |                                  | gesamt<br>n (%) |
|------------|--------------------------|----------------|----------------|----------------|----------------------------------|-----------------|
|            | keine Dysplasie<br>n (%) | CIN 1<br>n (%) | CIN 2<br>n (%) | CIN 3<br>n (%) | Plattenepithelkarzinom*<br>n (%) |                 |
| positiv    | 22 (5,15)                | 46 (10,77)     | 173 (40,52)    | 182 (42,62)    | 4 (0,94)                         | 427 (100)       |
| negativ    | 2 (7,41)                 | 6 (22,22)      | 7 (25,93)      | 12 (44,44)     | 0                                | 27 (100)        |
| gesamt     | 24 (5,3)                 | 52 (11,5)      | 180 (39,6)     | 194 (42,7)     | 4 (0,9)                          | 454 (100)       |

\* 2 × Koinzidenz mit intrazervikalem Adeno-Cis bzw. Adenokarzinom

elle statistische Berechnung verfügbaren richtig positiven Ergebnisse wird immer geringer.

Univariate statistische Analysen sind mit einfachen Mitteln durchführbar und lassen unter Einbeziehung der o.g. Einschränkungen die Berechnung von Angaben zur Validität zu [13, 14].

Besonders aussagekräftig für das Patientenmanagement bei der Gruppe III D ist der positive Prädiktionswert (ppv = richtig positiv/richtig positiv + falsch positiv). Für die HPV-Testung sind alle Maßzahlen der Validität gut berechenbar, aussagefähig und mit Literaturdaten vergleichbar.

Eine statistische Objektivierung ist u. a. durch die Anwendung des Punktschätzers Odds Ratio (95%-KI) möglich [15–17]. Hier wird die Erhöhung des Risikos hinsichtlich der Entwicklung einer CIN 2+-Läsion für eine eingangs High-Risk-HPV-positive III D-Patientin gegenüber einer Patientin mit High-Risk-HPV-Negativität berechnet.

## Ergebnisse

Die Auswertung basiert auf dem Vergleich einer initial diagnostisch „positiven“ zytologischen Untersuchung Gruppe III D als Feststellung des Vorliegens von Zellen einer gering- und/oder mittelgradigen Dysplasie des Plattenepithels der Portio vaginalis uteri und eines parallelen aktuellen High-Risk-HPV-Ergebnisses („positiv“ bzw. „negativ“) zum Eintrittszeitpunkt mit der histologischen oder zytologischen Aussage über das Vorliegen einer mit-

tel- und/oder hochgradigen Dysplasie oder eines Plattenepithelkarzinoms („positiv“) bzw. eines dys- und neoplasiefreien oder gering dysplastischen (CIN 1) Portioplattenepithels („negativ“) zum Auswertungszeitpunkt am Studienende. Durch die unterschiedlichen Einschlusszeitpunkte und histologischen Klärungen als Endpunkt ergeben sich unterschiedlich lange Beobachtungszeiten.

Die aus den zytologischen und histologischen Ergebnissen im Vergleich zur jeweiligen Eingangsdiagnose resultierenden Maßzahlen der Validität sind in **Tab. 1** dargestellt. Grundlegende Aussagen sind die positiven Prädiktionswerte für die Zytologie Gruppe III D von 32,29% und für das zusätzliche High-Risk-HPV-Testergebnis von 42,82%.

Die Ergebnisse der histologischen Klärungen anlässlich therapeutischer Maßnahmen stellen die wesentliche Quelle für richtig positive Bewertungen der Eingangsbefunde dar (**Tab. 2**). Die histologischen Diagnosen basieren auf 404 Konisationen, 47 Biopsien vor Laservaporisation und 3 Hysterektomien. Davon wurden in unserer Praxis 26,2% (n = 119) erstellt. Der hohe Anteil der histologischen Diagnose CIN 3 und der Karzinome muss vor dem Hintergrund einer im Verlauf vor der histologischen Klärung schon zytologisch diagnostizierten Progression gesehen werden. Deshalb ist eine getrennte Betrachtung der histologisch geklärten Fälle ohne bzw. mit nachfolgender zytologischer Befundsteigerung (Gruppe IVa) für eine Aussage über die Häufigkeit der histologischen Diagnosen bei III D nötig. Errechnet man die prozentuale Verteilung, resultiert folgendes Diagramm (**Abb. 2**).

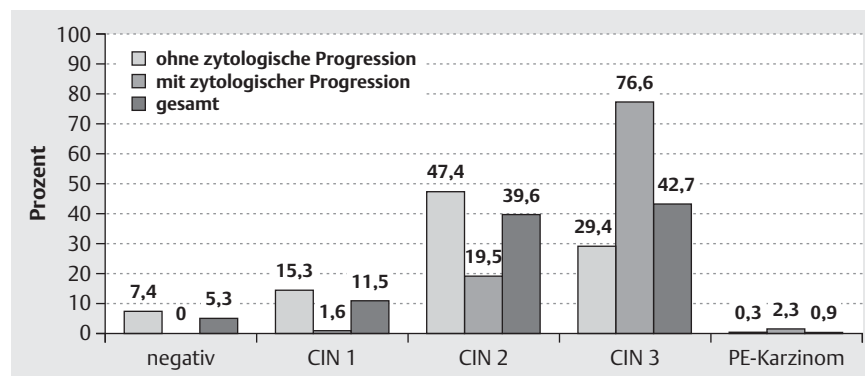**Abb. 2** Prozentualer Anteil histologischer Diagnosen ohne und mit zytologischer Progression (Gruppe IVa) vor Konisation bzw. Biopsie und Laservaporisation.

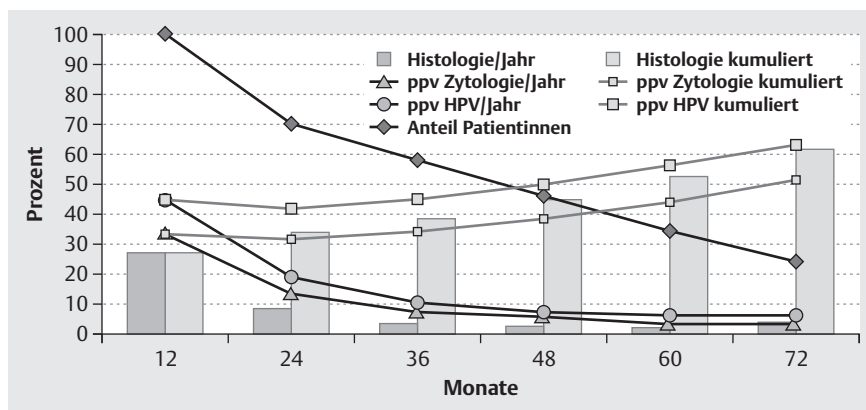

**Abb. 3** Positiver Prädiktionswert und Beobachtungszeit mit und ohne Kumulation der Ergebnisse histologisch geklärter Fälle.

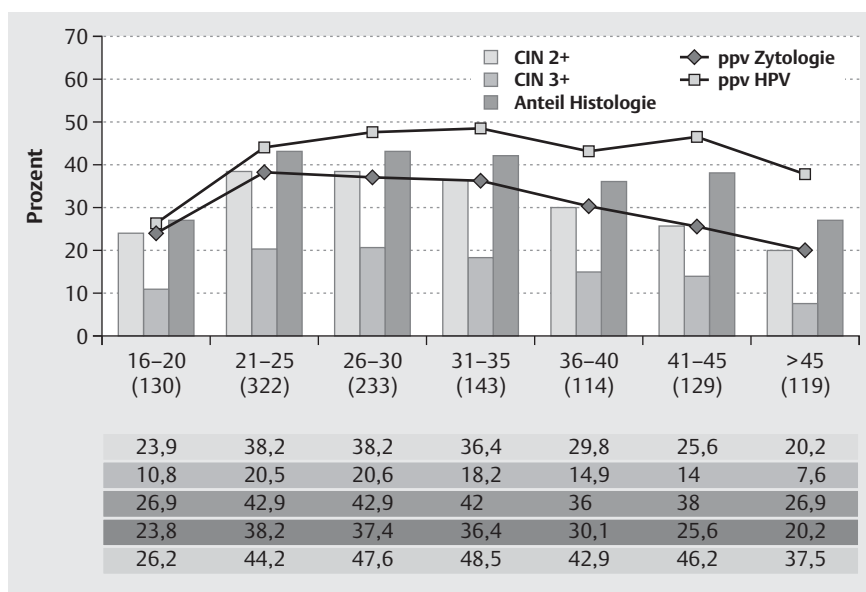

**Abb. 4** Positiver Prädiktionswert für die Erstdiagnose einer Gruppe III D in Bezug zu den Endpunkten CIN 2+ und CIN 3+ (in Prozent) in Abhängigkeit vom Alter.

Tab. 1 zeigt die zusammengefasste Auswertung der über die gesamte Beobachtungszeit gesammelten Daten bei einem Mittelwert von 39,74 Monaten, unabhängig von der individuellen Beobachtungszeit der einzelnen Patientin. Dieses Verfahren ist üblich, lässt aber nur allgemeine statistische Aussagen zu. Eine Präzisierung kann erreicht werden durch

1. Auswertungen zu definierten Beobachtungszeiten,
2. Vergleich von Altersgruppen und
3. die Betrachtung von Patientinnen mit unterschiedlicher Häufigkeit der Gruppe III D.

Die Auswertung zu bestimmten Beobachtungszeiten bedarf der grundsätzlichen Festlegung, ob früh ermittelte histologische Untersuchungsergebnisse in der Auswertung späterer Beobachtungszeiten mitgeführt werden oder nur die jeweils aktuellen in die Berechnung z.B. der positiven Prädiktion eingehen. Beide Möglichkeiten zeigt das Diagramm in Abb. 3. Beschränkt man sich auf die Auswertung jeweils eines Beobachtungsjahrs, stehen mit steigender Gesamtbeobachtungsdauer immer weniger histologisch geklärte Fälle (häufig „richtig positiv“) zur Verfügung, die regredierten Fälle (häufig „falsch positiv“) überwiegen. Damit sinkt der positive Prädiktionswert zunehmend.

Die auf das Alter bei Studieneintritt bezogene Auswertung erfolgt in 5-Jahres-Altersgruppen (Abb. 4). Die positive Prädiktion (CIN 2+) der III D-Zytologie hat ihre höchsten Werte in der Altersdekade 21–30 Jahre und nimmt dann kontinuierlich ab, während die positiven Prädiktionswerte für den High-Risk-HPV-Test deutlich und in den Altersgruppen 41–45 und > 45 signifikant ( $p < 0,001$ ) höher liegen. Ein etwa gleichartiger Verlauf findet sich für die Häufigkeit von CIN 3+ in den Altersgruppen. Eine grafische Darstellung des positiven Prädiktionswerts und der prozentualen Häufigkeit von CIN 2+ sowie CIN 3+ in der Auswertung von Patientinnen mit unterschiedlicher Anzahl von III D-Befunden pro Patientin zeigt Abb. 5. Hier ist für alle Parameter und beide Methoden eine nahezu kontinuierliche Zunahme mit Persistenz des III D-Befundes pro Patientin ablesbar. Die Gesamtergebnisse der histologischen Klärung weisen für die High-Risk-HPV-positiven Patientinnen eine positive Prädiktion von 84,31% und für die High-Risk-HPV-negativen Patientinnen von 70,37% aus. Es finden sich unter den 27 histologisch geklärten High-Risk-HPV-negativen Fällen 7 CIN 2- und 12 CIN 3-Ergebnisse.



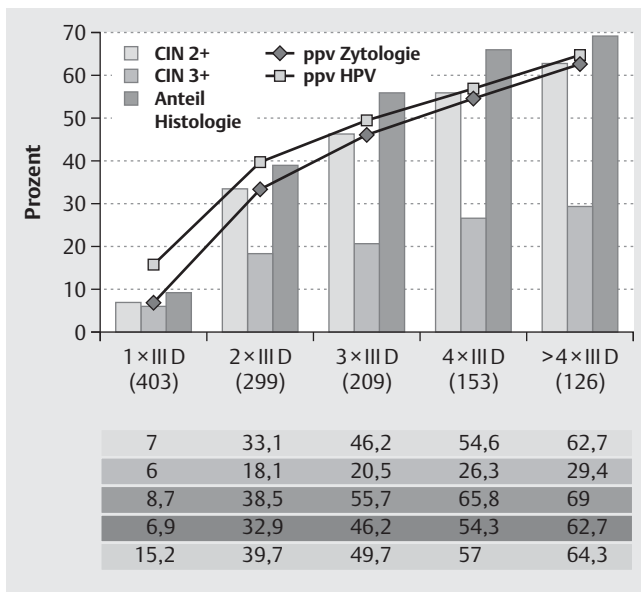

**Abb. 5** Positiver Prädiktionswert eines ein- bzw. mehrmaligen III D-Befundes für das Auftreten von CIN 2+ oder CIN 3+.

## Diskussion

### Zytologie

Die hier vorgestellten Zahlen zu Häufigkeit und zeitlichem Verlauf der zytologischen Diagnose III D legen nahe, dass die übliche und geforderte Praxis der jährlichen Erfassung und Auswertung statistischer Angaben für Überprüfungen zur Qualität der zytologischen Diagnostik in diesem Punkt versagen muss. Der biologische Verlauf zytologisch diagnostizierter Dysplasien des Plattenepithels der Cervix uteri ist im Einzelfall kaum korrekt erfassbar und schon gar nicht vorhersagbar [18,19]. Weiterhin ist zum Zeitpunkt der Diagnosestellung keine Aussage über den Zeitpunkt der biologischen Entstehung der gefundenen Läsion möglich. Nur die Analyse ausreichend lange beobachteter Verlaufsfälle bietet die Möglichkeit von Aussagen zur statistischen, nicht individuellen Wahrscheinlichkeit des klinischen Ausgangs [10–12]. Dabei ist die größte Schwierigkeit die Unsicherheit der repräsentativen Entnahme des Untersuchungsmaterials, die sicher einer der Gründe für das Vorliegen diskontinuierlicher Verläufe mit wechselnden Phasen von negativen und positiven zytologischen Verlaufsbefunden ist (28,7% in der vorliegenden Untersuchung). Das schränkt auch die Aussagekraft der üblicherweise vorgenommenen Einteilung in Regression, Persistenz, Progredienz von Befunden der Gruppe III D erheblich ein [12,20,21]. Für die Bewertung eines „persistenten“ III D-Befundes gibt es keinerlei zeitlichen Standard. Die in der vorliegenden Untersuchung längste Beobachtung einer Patientin mit insgesamt 11 III D-Befunden bei kurzen Unterbrechungen mit zytologischer Negativität beträgt 63 Monate, nach denen sie 7 negative Befunde hatte (Verlaufsdauer 94 Monate). Die Wertung von histologischen Ergebnissen nach Biopsien als „Goldstandard“ spiegelt nur einen momentanen und bezogen auf die Portio uteri örtlich begrenzten Zustand wider und sagt nichts über die längerfristige prognostische Aussagekraft der III D-Zytologie aus [22,23]. Als Verlaufsendpunkt können nur histologische Klärungen (Konisation, Laservaporisation nach Biopsie, Hysterektomie) gewertet werden, da der biologische Verlauf im Sinne der sekundären Zervixkarzinom-Präven-

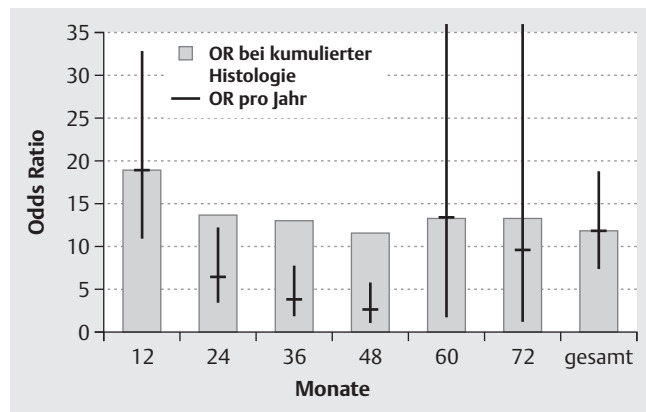

**Abb. 6** Odds Ratio für die High-Risk-HPV-Eingangsergebnisse und Beobachtungszeit mit und ohne Kumulation der Ergebnisse histologisch geklärter Fälle (95%-KI).

tion unterbrochen ist. Die Bewertung von Regression und Progression sollte durch die statistische Berechnung des positiven Prädiktionswerts erfolgen, um eine Vergleichbarkeit der Ergebnisse zu ermöglichen. Auch die Beobachtungszeit spielt für die Vergleichbarkeit von Ergebnissen bei III D-Patientinnen eine erhebliche Rolle. Im Mittel wurden die für die Beurteilung der III D-Zytologie wichtigen histologischen Klärungen bei den therapeutischen Maßnahmen nach 17,05 Monaten durchgeführt, was durchaus noch im Einklang mit der zeitlichen Regression von HPV-Infektionen steht. Im Sinne der Karzinomprävention wird damit aber natürlich ein weiterer biologischer Ablauf unterbrochen, was Aussagen zur Prognose einschränkt. Bei deutlich längeren Beobachtungszeiten überwiegen mehr und mehr die zytologisch negativen Verläufe, und der positive Prädiktionswert wird geringer (● **Abb. 3**). Weiterhin kommen Neuinfektionen mit High-Risk-HPV als Ursache späterer positiver Ergebnisse infrage (● **Abb. 6**). Die Gegenüberstellung der einzelnen Altersgruppen (● **Abb. 4**) mit den in höheren Altersgruppen schlechteren Prädiktionswerten der III D-Zytologie ist Bestandteil der täglichen diagnostischen Erfahrung und erklärt sich aus dem Fehlen reifer Zellpopulationen und den dadurch eingeschränkten Vergleichsmöglichkeiten zwischen dysplastischen und physiologischen Zellpopulationen im zytologischen Bild. Einerseits ist das Auffinden dysplastischer Zellen erschwert und andererseits können unregelmäßige Differenzierungseinschränkungen des Plattenepithels mit Form- und Größenunterschieden der Zellkerne zu falsch positiven zytologischen Diagnosen führen. Dass die Anzahl der III D-Befunde pro Patientin (● **Abb. 5**) als Ausdruck der Persistenz zu einer fast linearen Verbesserung des positiven Prädiktionswerts führt, ist bei Einhaltung ausreichend langer Untersuchungsabstände eine gute Grundlage für klinische Abklärungs- und Therapiemaßnahmen. Eine zusätzliche High-Risk-HPV-Testung zeitigt in diesem Zusammenhang keine signifikante Verbesserung der prognostischen Aussage.

Die 454 ausgewerteten histologischen Untersuchungsergebnisse zeigen mit 42,8% einen sehr hohen Anteil von CIN 3+-Diagnosen, was relativiert wird durch die Tatsache, dass in 28,9% (131 Fälle) die histologische Klärung erst nach einem folgenden zytologischen Befund Gruppe IVa erfolgte. Für die nach einer zytologischen Diagnose Gruppe III D durchgeführten histologischen Klärungen beträgt der Anteil von CIN 3+ 29,72%, was dem Anteil bei allen direkt nach einem III D-Befund histologisch geklärten Pa-

tientinnen unserer Praxis ( $n = 1100$ , 25,7%) nahe kommt. In den einzelnen Auswertungen (Alter, **Abb. 4**, Anzahl III D/Patientin, **Abb. 5**) ist der prozentuale Anteil von CIN 3+ etwa proportional zum Anteil von CIN 2+. In der Literatur wird als Spätfolge der Konisation u. a. eine erhöhte Frühgeburtlichkeit angegeben [24, 25]. Für die histologisch geklärten Patientinnen der vorliegenden Untersuchung kann zumindest festgestellt werden, dass die Therapie mittels Konisation in den Altersgruppen bis 35 Lebensjahre eine hohe positive Prädiktion aufweist (85,7–87,6%) und somit ein geringer Anteil vom histologischen Ergebnis her unnötig war. Erst bei Patientinnen, die älter als 40 Jahre sind, sinkt die positive Prädiktion auf etwa 70%.

### High-Risk-HPV-Untersuchung

Eine Triage zytologisch suspekter oder positiver Untersuchungsergebnisse ist in regional unterschiedlichem Maße zumindest fakultativer Bestandteil der Zervixkarzinom-Früherkennung [26, 27]. Allerdings ist die gesamte gynäkologische Zytologie nicht vergleichbar mit der speziellen Situation der Befundgruppe III D. Während der Zytologie allgemein eine schlechte Sensitivität zukommt, die mit einer hochsensitiven Methode wie der HPV-Untersuchung verbessert werden könnte, haben die Befundgruppe III D und der HPV-Test jeweils eine hohe Sensitivität bei schlechter Spezifität bzw. positiver Prädiktion und können sich daher theoretisch nicht ergänzen [28]. Für die Triage zytologischer Befunde der Gruppe III D mittels HPV-Test liegen nur wenige Untersuchungen vor, die eine Verbesserung des positiven Vorhersagewerts auch nicht erkennen lassen [4]. Die z. B. in der Hannover-Tübingen-Studie dargestellte bessere diagnostische Aussage einer zusätzlichen High-Risk-HPV-Untersuchung wurde für „auffällige“ zytologische Befunde (II W, III D und III), darunter nur 61 III D-Eingangsdiaagnosen, gemeinsam erhoben und ist dadurch nicht direkt vergleichbar [29]. Die in der vorliegenden Arbeit ausgewerteten III D-Patientinnen zeigten eingangs in 72% High-Risk-HPV-Positivität. Die positive Prädiktion in dieser Gruppe beträgt insgesamt 42,56%. Die Gruppe der eingangs High-Risk-HPV-negativen Patientinnen weist in 41,4% zytologische Zeichen einer HPV-Infektion und/oder Low-Risk-HPV-Positivität auf und hat einen positiven Prädiktionswert von nur 6,01%. Beide Patientinnengruppen unterscheiden sich deutlich im Durchschnittsalter der Patientinnen mit 29,9 (High-Risk-HPV-positiv) und 35,1 (High-Risk-HPV-negativ) Jahren sowie auch der Anzahl der Gruppe-III D-Befunde pro Patientin (2,84 vs. 1,57). Die Werte der positiven Prädiktion im zeitlichen Verlauf lassen durchaus den Schluss zu, dass ein negatives High-Risk-HPV-Ergebnis bei einer erstmaligen III D-Zytologie eine gute negative Prädiktion besonders der CIN 3-Läsionen hat und abwartendes Verhalten rechtfertigt. Bei Betrachtung der histologisch geklärten Patientinnen relativiert sich diese Aussage, da 19 der 27 High-Risk-HPV-negativen Patientinnen CIN 2+-Ergebnisse, darunter 12 CIN 3, aufwiesen (relativer ppv 70,37%). Diese positiven histologischen Ergebnisse sind im Mittel 27,65 (3–70) Monate nach Studieneingang ermittelt worden. Bei den sehr spät erfolgten histologischen Klärungen können also für das positive histologische Ergebnis durchaus Neuinfektionen eine ursächliche Rolle gespielt haben. Sechs der Patientinnen wiesen im späteren Verlauf bis zur histologischen Klärung High-Risk-HPV-Positivität auf. Zwei Patientinnen waren auch bei folgenden HPV-Tests negativ, für die anderen Patientinnen sind weitere Untersuchungen nicht ermittelbar. Auch die statistische Risikoerhöhung für High-Risk-HPV-positive Patientinnen aus der Berechnung der Odds Ratio pro Verlaufsjahr zeigt nach kontinuierlichem Abfall bis 48 Monate

einen Anstieg für die letzten beiden Beobachtungsjahre, während die Werte bei Einbeziehung aller histologischen Klärungen pro Beobachtungsjahr nahezu gleich sind (**Abb. 6**). Die in den letzten beiden Beobachtungsjahren erhobenen positiven histologischen Befunde stehen vermutlich nicht mehr in kausalem Zusammenhang mit dem High-Risk-HPV-Eingangsergebnis. Die Zusatzinformation aus der High-Risk-HPV-Diagnostik erhöht den positiven Prädiktionswert für eine Patientin mit einem ersten zytologischen Befund III D um etwa 10%, diese Steigerung ist auch statistisch signifikant ( $p < 0,001$ ). In der weiteren Führung dieser Patientinnen ermöglicht diese bessere statistische Aussage zu diesem Zeitpunkt und auch im weiteren Verlauf aber keine individuelle praktische Umsetzung in eine sinnvolle kurative Handlung. Bei Betrachtung aller Patientinnen mit einem zytologisch oder histologisch negativen Verlauf finden sich zum Zeitpunkt des ersten III D-Befundes nur 39% mit negativem, aber 61% mit positivem High-Risk-HPV-Ergebnis, was die auf den weiteren Verlauf bezogene ungünstige prognostische Aussage der Kombination eines zytologischen Befundes III D mit High-Risk-HPV-Positivität zumindest relativiert.

### Schlussfolgerungen

- ▼ Die vorgestellten Ergebnisse und Daten objektivieren und bestätigen die in Anwendung und Patienten-Management der zytologischen Gruppe III D angesammelten Kenntnisse und Erfahrungen.
- ▶ Die hohe Rate spontaner Regressionen ist die Basis für einen besonnenen, primär beratenden Umgang mit der Tatsache des erst- oder zweimaligen zytomorphologischen Nachweises einer gering- und/oder mittelgradigen Plattenepitheldysplasie bei gleichzeitiger Intensivierung der Zellmaterialentnahme sowie der klinischen und kolposkopischen Routinediagnostik.
- ▶ Zu diesem frühen Zeitpunkt erhöhen Zusatzuntersuchungen oder eine Überweisung in eine Dysplasiesprechstunde mit Wiederholung und Erweiterung des diagnostischen Spektrums eher das Krankheitsbewusstsein der Patientin und produzieren per se nicht gerechtfertigte Kosten.
- ▶ Erst bei Persistenz des zytologischen Befundes unter Einhaltung ausreichend langer Kontrollabstände ist eine alters- und reproduktionsspezifische Therapie nach kolposkopischer Lokalisation Erfolg versprechend und ergebnisorientiert (CIN 2+) indiziert. Die Gefahr der zeitnahen Entdeckung eines Plattenepithelkarzinoms ist statistisch sehr gering ( $< 1\%$ ).
- ▶ Die hohe negative Prädiktion einer High-Risk-HPV-Testung (besonders für eine CIN 3-Läsion) relativiert altersabhängig die zytomorphologische Erstdiagnose einer gering- und/oder mittelgradigen Dysplasie, setzt sie aber nicht außer Kraft.
- ▶ Eine Verbesserung der individuellen prognostischen Bewertung bei Patientinnen mit einem ersten III D-Befund ist aus den Ergebnissen der zusätzlichen High-Risk-HPV-Testung nicht ableitbar.

### Interessenkonflikt

- ▼ Nein.

## Literatur

- 1 Reagan JW, Seidemann IL, Sarcusa Y. The cellular morphology of carcinoma in situ and dysplasia or atypical hyperplasia of the uterine cervix. *Cancer* 1953; 6: 224–235
- 2 Richart RM. Natural history of cervical intraepithelial neoplasia. *Clin Obstet Gynecol* 1967; 10: 748–784
- 3 Wagner D. Münchner Nomenklatur II für die gynäkologische Zytodiagnostik. *Acta Cytol* 1990; 34: 900–902
- 4 Böhmer G, Petry KU, Iftner T et al. Der DNS-Nachweis humaner Papillomviren mittels Hybrid Capture ist als sekundäre Screeningmethode bei rezidivierenden atypischen Abstrichen der Befundklasse Pap IIID ungeeignet. *Zentralbl Gynakol* 2002; 124: 111–115
- 5 Gullota G, Margariti PA, Rabitti C et al. Cytology, histology, and colposcopy in the diagnosis of neoplastic non-invasive epithelial lesions of the cervix. *Eur J Gynecol Onc* 1997; 18: 36–38
- 6 Hording U, Junge J, Rygaard C et al. Management of low-grade CIN: follow up or treatment? *Eur J Obstet Gynecol Reprod Biol* 1995; 62: 49–52
- 7 Sadler L, Saftlas A, Wang W et al. Treatment for cervical intraepithelial neoplasia and risk of preterm delivery. *Obstet Gynecol Surv* 2004; 59: 698–699
- 8 Wentzensen N, Klug S. Früherkennung des Zervixkarzinoms: Suche nach einem Gesamtkonzept. *Deutsches Ärzteblatt* 2008; 105: 617–622
- 9 Böcking A, Matherby H. Abklärung zervikaler Dysplasien mittels DNA-Bild-Zytometrie. *Pathologie* 1999; 20: 25–33
- 10 Rörig M. Die Differenzierung der zytologischen Papanicolaou IIID und III-Befunde. Inaugural-Dissertation, Tübingen 1986
- 11 Rummel HH, Frick R, Heberling D et al. Verlaufskontrolle bei Patientinnen mit suspekter Zytologie (Papanicolaou IIID). *Geburtsh Frauenheilk* 1977; 37: 521–526
- 12 Sander H, Kattner W, Soost HJ. Die zytologische Diagnose einer Dysplasie leichten und mittleren Grades. *Geburtsh Frauenheilk* 1978; 38: 726–734
- 13 Raab S. Diagnostic accuracy in cytopathology. *Diagnostic Cytopathology* 1993; 10: 68–75
- 14 Soost HJ, Baur S. Gynäkologische Zytodiagnostik. 5. Aufl. Stuttgart, New York: Thieme; 1990
- 15 Bland JM, Altman DG. Statistics notes: the odds ratio. *BMJ* 2000; 320: 1468
- 16 Held U. Was ist eine „Odds Ratio“ – und wann wird sie verwendet? *Schweiz Med Forum* 2010; 10: 634–635
- 17 Sauerbrei W, Blettner M. Interpretation der Ergebnisse von 2x2-Tafeln: Teil 9 der Serie zur Bewertung wissenschaftlicher Publikationen. *Dtsch Arztebl Int* 2009; 106: 795–800
- 18 Elit LM. Pitfalls in the diagnosis of cervical intraepithelial neoplasia 1. *J Lower Genital Tract Dis* 2004; 8: 181–187
- 19 Östör AG. Natural history of cervical intraepithelial neoplasia: a critical review. *Int J Gynecol Pathol* 1993; 12: 186–192
- 20 Breinl H. Zytologie des Zervixkarzinoms und seiner Vorstadien. 15. Fortbildungstagung für klinische Zytologie. München; 26.–30 November 1999
- 21 Schenck U. IIID- und IVa-Befunde: Aspekte zu Verlauf und Patientenmanagement. 20. Fortbildungstagung Klinische Zytologie. München; 2009
- 22 Stoler MH, Vichnin MD, Ferenczy A et al. The accuracy of colposcopic biopsy: analyses from the placebo arm of the Gardasil clinical trials. *Int J Cancer* 2011; 128: 1354–1362
- 23 Zuchna C, Hager M, Tringler B et al. Diagnostic accuracy of guided cervical biopsies: a prospective multicenter study comparing the histopathology of simultaneous biopsy and cone specimen. *Am J Obst Gyn* 2010; 203: 321.e1–321.e6
- 24 Kyrgiou M, Koliopoulous G, Martin-Wirsch P et al. Obstetric outcomes after conservative treatment for intraepithelial or early invasive cervical lesions: systematic review and meta-analysis. *Lancet* 2006; 367: 489–498
- 25 Sadler L, Saftlas A, Wang W et al. Treatment for cervical intraepithelial neoplasia and risk of preterm delivery. *Obstet Gynecol Surv* 2004; 59: 698–699
- 26 Ikenberg H. HPV-Nachweis zur Triage bei auffälligen zytologischen Befunden. *Gynäkologe* 2003; 36: 297–304
- 27 Schneider A, Zahm DM, Kirchmayr R et al. Screening for cervical intraepithelial neoplasia grade 2/3: validity of cytologic study, cervicography, and human papillomavirus detection. *Am J Obstet Gynecol* 1996; 174: 1534–1541
- 28 Schiffmann M, Wentzensen N, Wacholder S et al. Human papillomavirus testing in the prevention of cervical cancer. *J Natl Cancer Inst* 2011; 103: 368–383
- 29 Petry KU, Menton S, Menton M et al. Inclusion of HPV-testing in routine cervical cancer screening for women above 29 years in Germany: Results for 8466 patients. *Br J Cancer* 2003; 88: 1570–1577
